# Supplementary material for: The reciprocal interplay between TNFα and the circadian clock impacts on cell proliferation and migration in Hodgkin lymphoma cells
Source: PubMed Central journal article supplement (PMC6068144; doi:10.1038/s41598-018-29847-z), 2018-07-31
Supplement: 41598_2018_29847_MOESM1_ESM.pdf [file 41598_2018_29847_MOESM1_ESM.pdf]

## Supplementary Information

### **The reciprocal interplay between TNF $\alpha$ and the circadian clock impacts on cell proliferation and migration in Hodgkin lymphoma cells**

Mónica Abreu<sup>1,2</sup>, Alireza Basti<sup>1,2</sup>, Nikolai Genov<sup>1,2</sup>, Gianluigi Mazzocchi<sup>3</sup>, Angela Relógio<sup>1,2,\*</sup>

<sup>1</sup>Charité - Universitätsmedizin Berlin, corporate member of Freie Universität Berlin, Humboldt - Universität zu Berlin, and Berlin Institute of Health, Institute for Theoretical Biology, Germany

<sup>2</sup>Charité - Universitätsmedizin Berlin, corporate member of Freie Universität Berlin, Humboldt - Universität zu Berlin, and Berlin Institute of Health, Medical Department of Hematology, Oncology, and Tumor Immunology, Molecular Cancer Research Center, Germany

<sup>3</sup>Department of Medical Sciences, Division of Internal Medicine and Chronobiology Unit, IRCCS “Casa Sollievo della Sofferenza”, San Giovanni Rotondo (FG), Italy

\*Corresponding author: [angela.relogio@charite.de](mailto:angela.relogio@charite.de)

## Supplementary Materials

**Table S1** – Pairwise interactions Clock-Immune Genes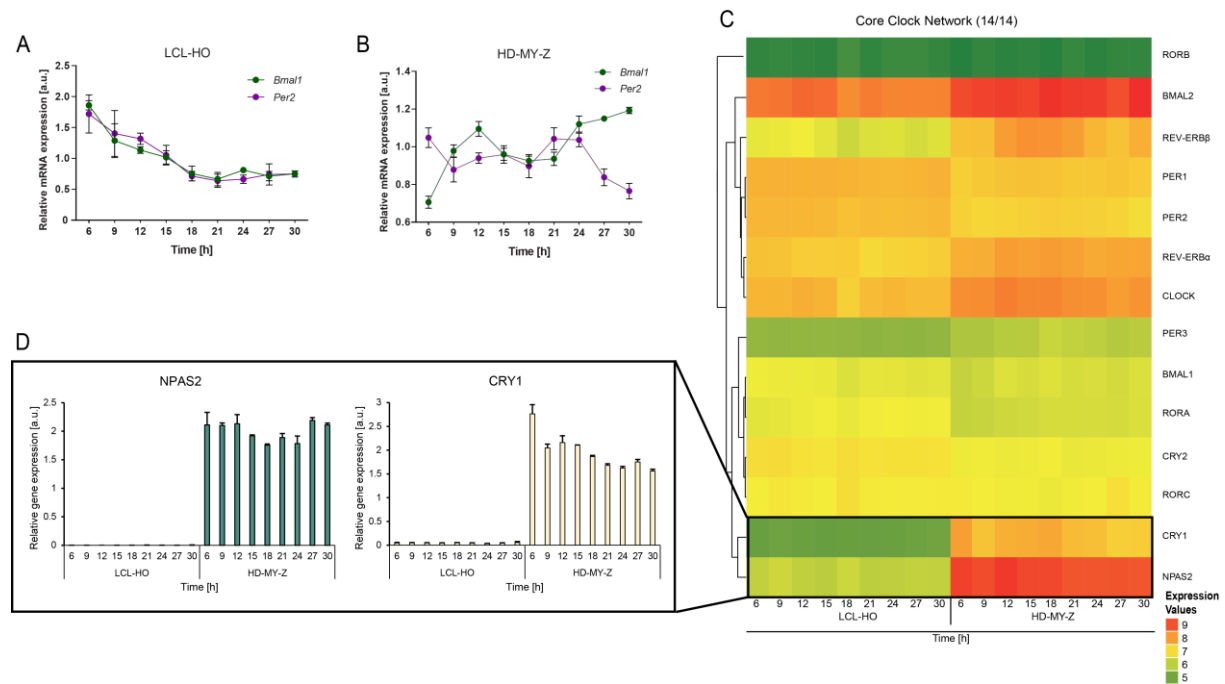

**Figure S1** – LCL-HO and HD-MY-Z have differential circadian phenotypes Depicted are gene expression values of *Bmal1* and *Per2* for LCL-HO (**A**) and HD-MY-Z (**B**) over 24 h (n=3, mean  $\pm$  SEM), expression of core-clock genes in the HTA 2.0 for both cell lines (**C**) and (**D**) 24h time-course qPCR for *NPAS2* and *CRY1* genes (n=3, mean  $\pm$  SEM).

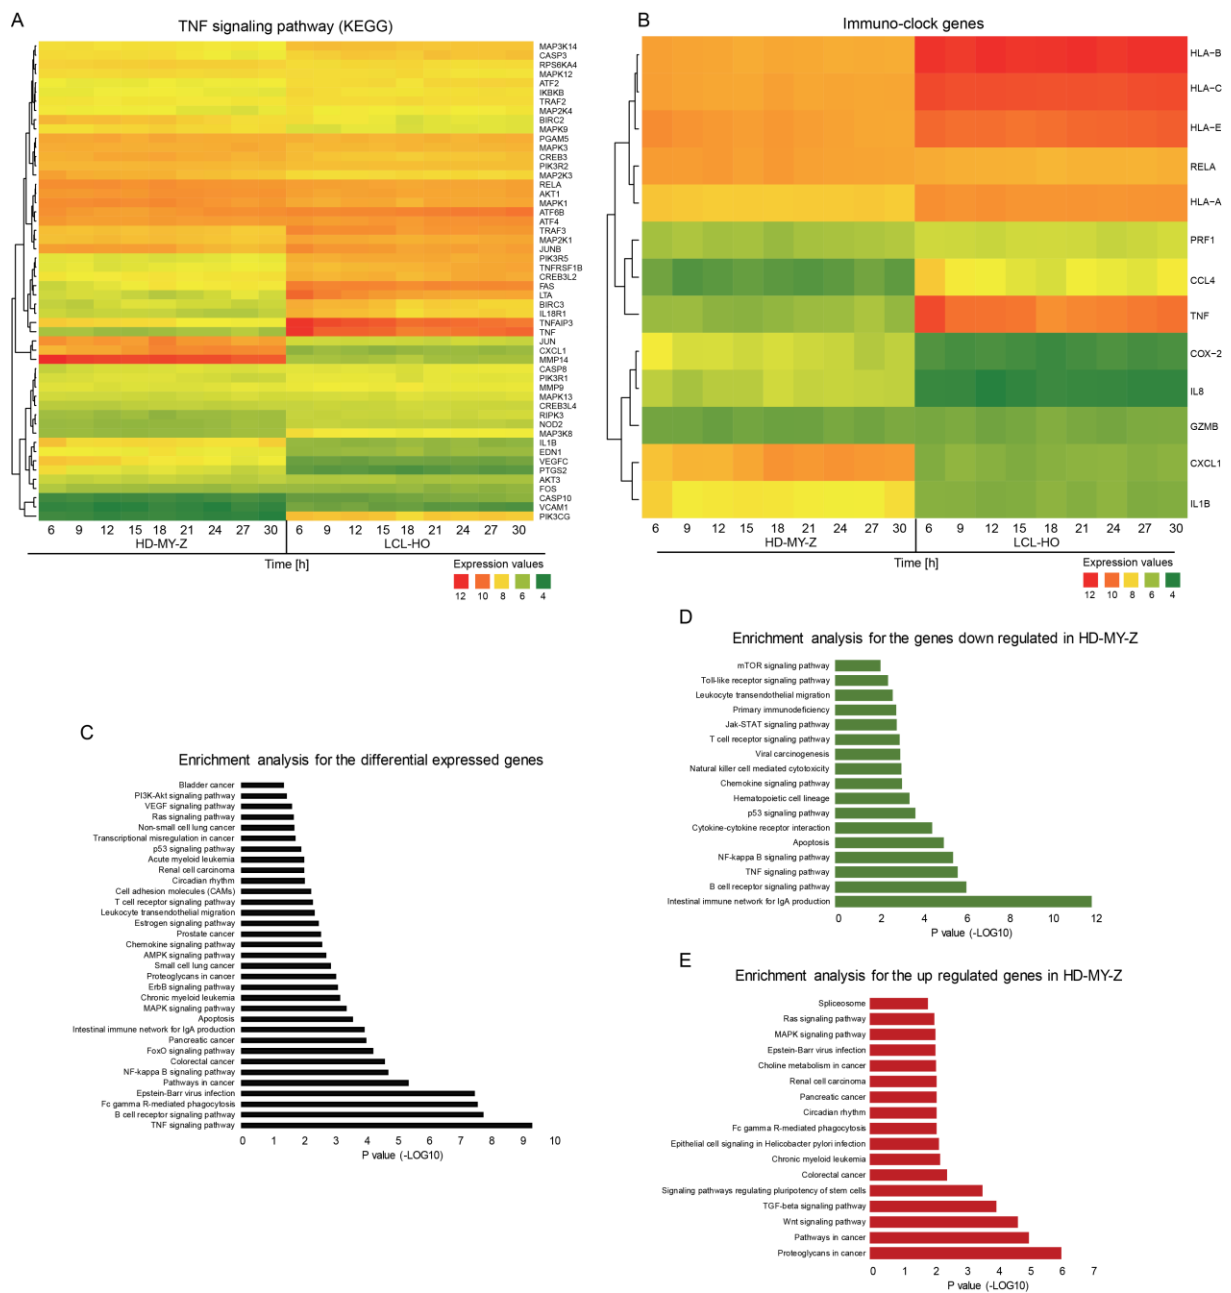

**Figure S2 – The TNF signalling pathway is differentially expressed in HL. (A and B)** heatmaps showing the relative expression of the differentially expressed genes in the TNF signalling pathway and immune-clock genes (from Figure 1). **(C, D and E)** enrichment analysis for KEGG pathways of the differentially expressed genes in LCL-HO and the HL cell line HD-MY-Z.

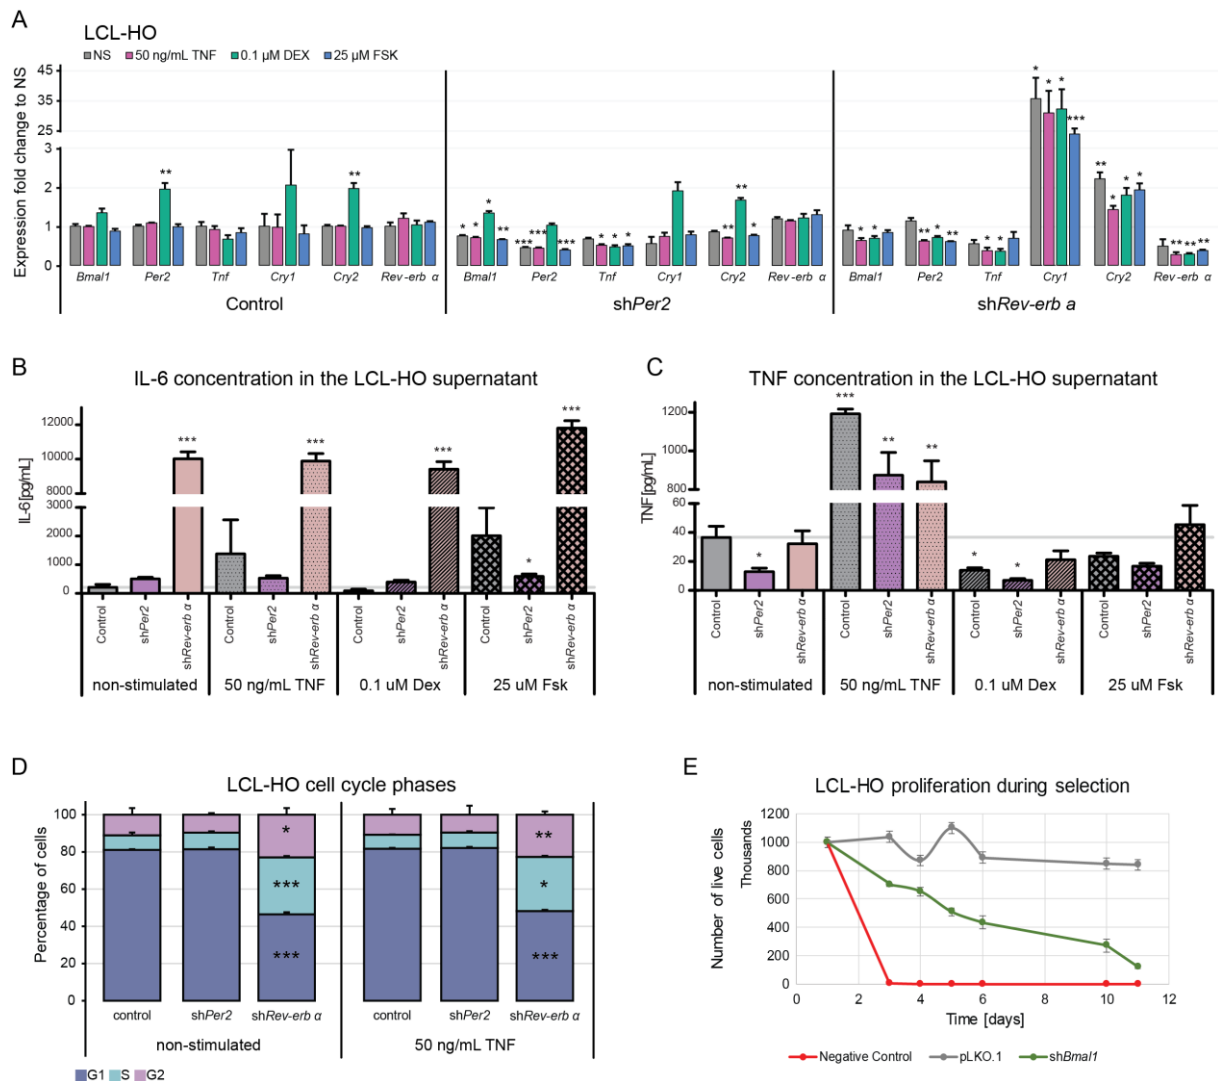

**Figure S3 – TNF affects cell cycle and expression of core-clock genes in LCL-HO cell line. (A)** Gene expression qPCR data (n=3, mean ± SEM), **(B)** IL-6 and **(C)** TNF concentration in the supernatant (n=3, mean ± SEM) **(D)** measurements of cell cycle phases (n=3, mean ± SEM) after shRNA KD of *Per2* and *Rev-erb α* and stimulation for 3 days with 50 ng/mL of recombinant human TNF, 0.1 μM of dexamethasone and 25 μM of forskolin. **(E)** proliferation measurements after *shBmal1* (n=3, mean ± SEM). Statistics for the comparison to non-stimulated using unpaired t test: \* p < 0.05, \*\* p < 0.01, \*\*\* p < 0.001. LCL-HO WT, LCL-HO transduced with pLKO.1 empty vector and transduced with *shBmal1* KD vector proliferation during the selection with puromycin.

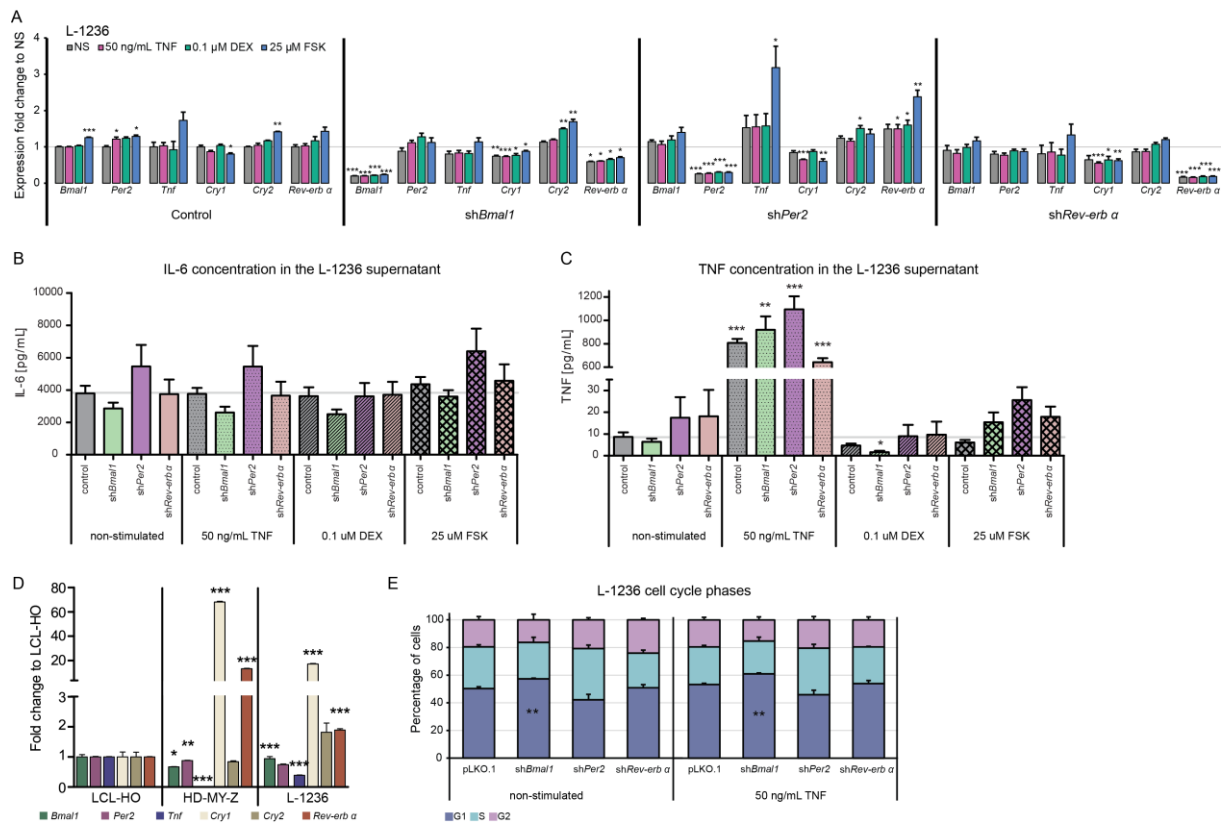

**Figure S4 – TNF affects cell cycle and expression of core-clock genes in the HL cell line L-1236.** (A) Gene expression qPCR data (n=3, mean ± SEM), (B) expression levels of core-clock genes and *Tnf* in HL cell lines, qPCR data (n=3, mean ± SEM) (C) IL-6 and (D) TNF concentration in the supernatant (n=3, mean ± SEM) (E) measurements of cell cycle phases (n=3, mean ± SEM) after shRNA KD of *Bmal1*, *Per2* and *Rev-erb α* and posterior stimulation for 3 days with 50 ng/mL of recombinant human TNF, 0.1 μM of dexamethasone and 25 μM of forskolin. (Statistics for the comparison to non-stimulated using unpaired t-test: \* p < 0.05, \*\* p < 0.01, \*\*\* p < 0.001.

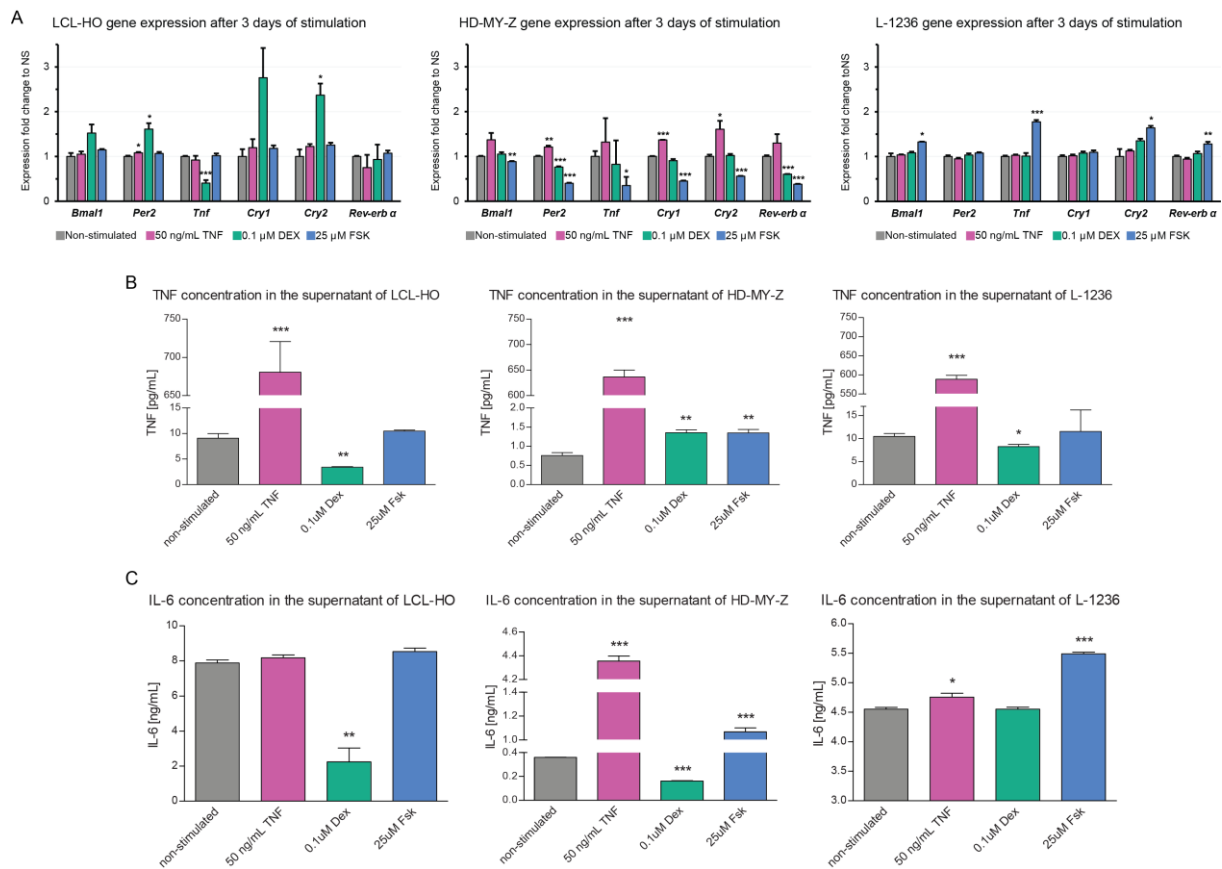

**Figure S5 – Overall comparison for the effects of TNF on the core-clock in HL cell lines. (A)** Gene expression qPCR data ( $n=3$ , mean  $\pm$  SEM), **(B)** TNF and **(C)** IL-6 concentration in the supernatant ( $n=3$ , mean  $\pm$  SEM) for the 3 cell lines (WT) after 3 days stimulation with 50 ng/mL of recombinant human TNF, 0.1  $\mu$ M of dexamethasone and 25  $\mu$ M of forskolin. Statistics for the comparison to non-stimulated using unpaired t test: \*  $p < 0.05$ , \*\*  $p < 0.01$ , \*\*\*  $p < 0.001$ .

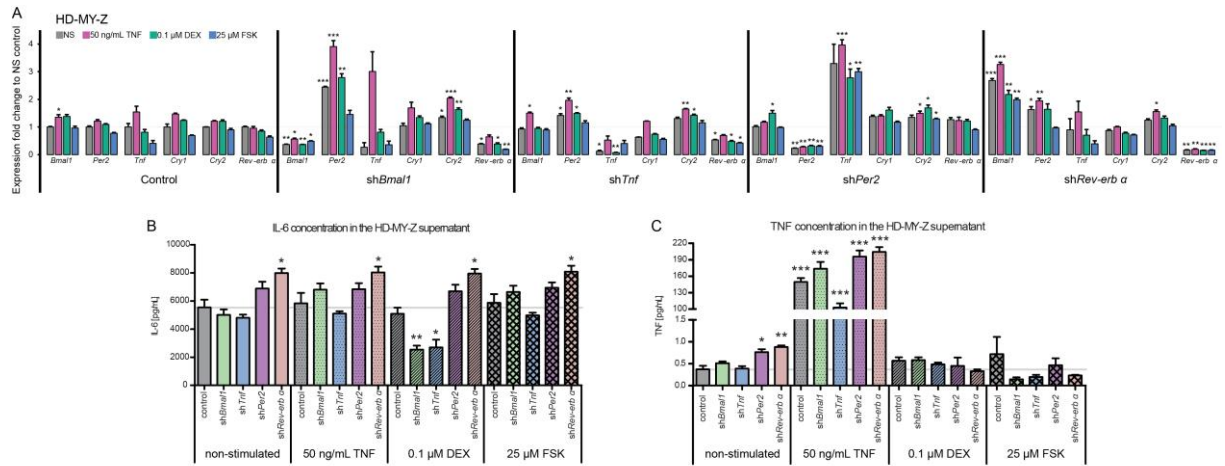

**Figure S6 – The core-clock affects expression of TNF and IL-6 in the HL cell line HD-MY-Z. (A)**

Gene expression qPCR data ( $n=3$ , mean  $\pm$  SEM), **(B)** IL-6 and **(C)** TNF concentration in the HD-MY-Z supernatant ( $n=3$ , mean  $\pm$  SEM) for the 3 cell lines (WT) after 3 days stimulation with 50 ng/mL of recombinant human TNF, 0.1  $\mu$ M of dexamethasone and 25  $\mu$ M of forskolin.

Statistics for the comparison to non-stimulated using unpaired t test: \*  $p < 0.05$ , \*\*  $p < 0.01$ ,

\*\*\*  $p < 0.001$ .
